# Supplementary material
Source: PubMed Central journal article supplement (PMC8803759)

**Supplementary Figure 1 - PEEP level and incidence of CRRT during the study period**

A) PEEP level applied during the first week of ICU stay in patients divided by week of admission (1 to 10, see text for details), \* $p < 0.01$  vs weeks 1 to 5, #  $p < 0.05$  vs weeks 2 to 4, One Way ANOVA. B) Incidence of CRRT by week of admission. In panel A the horizontal line represents median, the box plot represents interquartile range and the bars represent minimum and maximum values

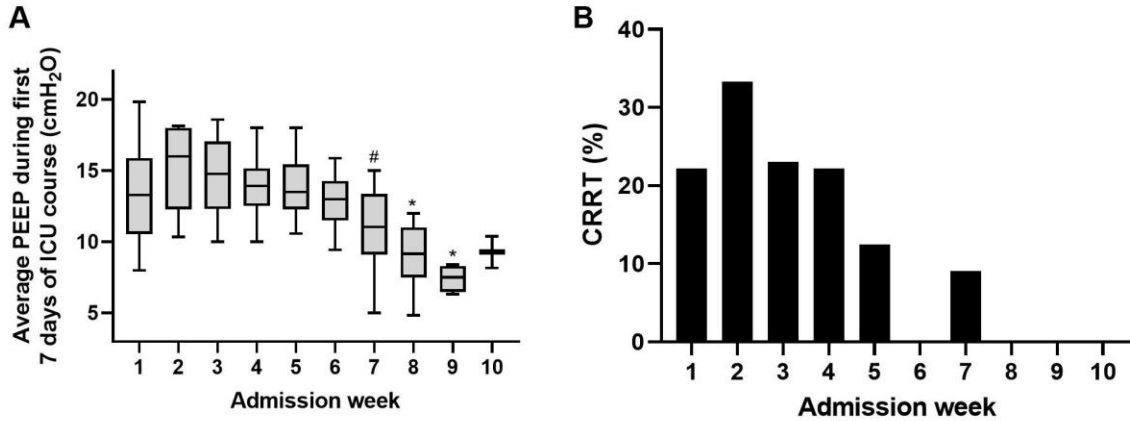

Supplement: 40620_2021_1100_MOESM1_ESM.pdf [file 40620_2021_1100_MOESM1_ESM.pdf]
